# Supplementary material for: Superoxide Production by Macrophages and T Cells Is Critical for the Induction of Autoreactivity and Type 1 Diabetes
Source: PubMed Central journal article supplement — Diabetes. 2011 Jul 18;60(8):2144–51. doi: 10.2337/db10-1222 (PMC3142064; doi:10.2337/db10-1222), 2011-07-18

SUPPLEMENTARY DATA

**Supplementary Figure 1.** NOD.Ncf1m1J CD8+ T cells fail to exhibit a respiratory burst after polyclonal stimulation. Purified splenic CD8+ T cells were stimulated with anti-CD3 and anti-Ig cross-linking for 30 minutes. ROS production was detected by flow cytometry as the increase in fluorescence resulting from the oxidation of CM-H2DCFDA. The histogram is a representative plot from a total of 4 mice per genotype.

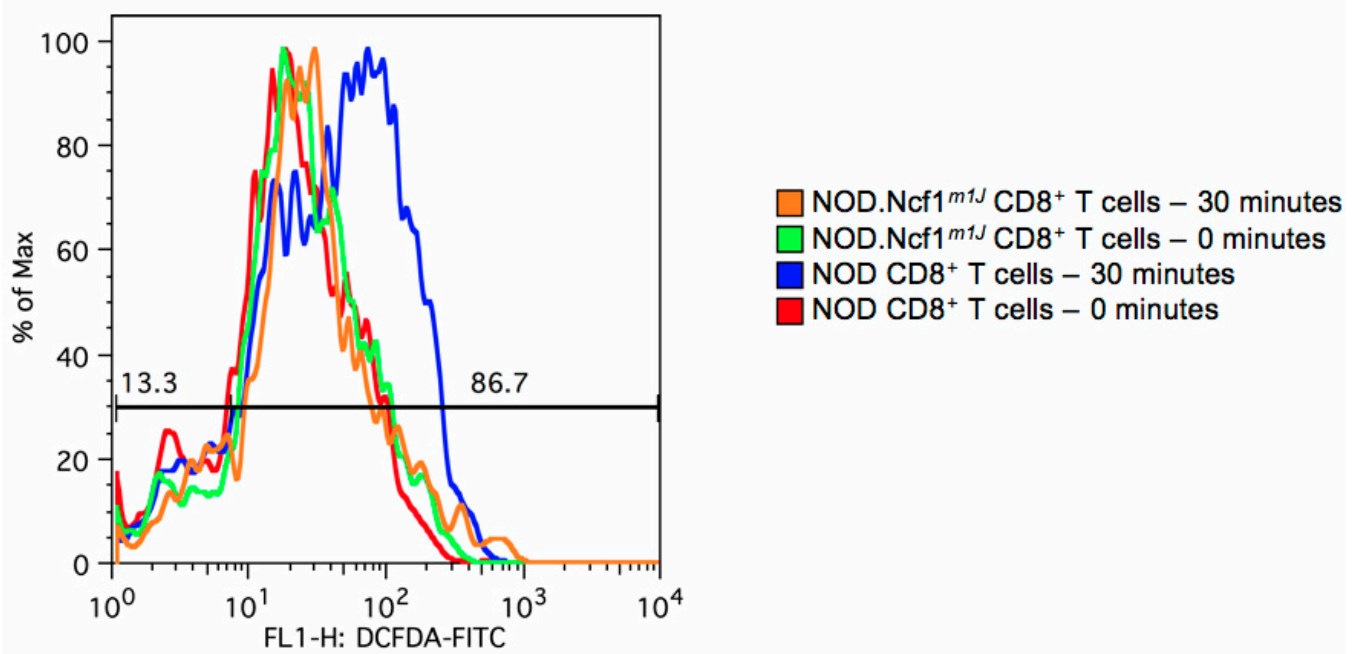

Supplement: supp_db10-1222_DB101222SupplementaryData.pdf [file supp_db10-1222_DB101222SupplementaryData.pdf]
